# Supplementary material
Source: MDPI journal article supplement (https://www.mdpi.com/2304-6740/10/11/199)
Supplement: s1 [file s1]

## **New ferrocene-based metalloligand with two triazole carboxamide pendant arms and its iron(II) complex: synthesis, crystal structure, $^{57}\text{Fe}$ Mössbauer spectroscopy, magnetic properties and theoretical calculations**

Peter Antal <sup>a</sup>, Ivan Nemec <sup>a,b</sup>, Jiří Pechoušek <sup>c</sup>, Radovan Herchel <sup>a\*</sup>

<sup>a</sup> Department of Inorganic Chemistry, Faculty of Science, Palacký University Olomouc, 17. listopadu 12, Olomouc, 77146, Czech Republic

<sup>b</sup> Central European Institute of Technology, CEITEC BUT, Technická 3058/10, 61600, Brno, Czech Republic

<sup>c</sup> Department of Experimental Physics, Faculty of Science, Palacký University Olomouc, 17. listopadu 12, Olomouc, 77146, Czech Republic

\* Correspondence: radovan.herchel@upol.cz

### **Table of content:**

**Figure S1:**  $^1\text{H}$ - $^1\text{H}$  *g*-COSY NMR spectrum of **L**.

**Figure S2:**  $^1\text{H}$ - $^{13}\text{C}$  *g*-HMQC NMR spectrum of **L**.

**Figure S3:**  $^1\text{H}$ - $^{13}\text{C}$  *g*-HMBC NMR spectrum of **L**.

**Figure S4:** Comparison of FTIR spectra of studied ligand (**L**) and complex (**1**).

**Figure S5:** a) Representation of the two-dimensional hydrogen-bonding network in the crystal structure of **L**. The network of interconnected neighboring molecules of **L** is parallel with the plane *ac*. b) Representation of the final three-dimensional network created by interconnection of layers by C–H $\cdots\pi$  interactions. The layers are colored for clarity (orange and green).

**Figure S6:** The UV-Vis absorption spectrum of ligand **L** in DCM solution with molar concentrations  $c = 2.1 \text{ mmol/dm}^3$  (*top*) and  $c = 43.2 \text{ }\mu\text{mol/dm}^3$  (*bottom*).

**Table S1:** Crystal data and structure refinements for **L**.

**Table S2:** The XYZ coordinates in Ångströms of the molecular structure of **L** optimized by DFT. The charge of the compound was 0, the spin multiplicity was 1.

**Table S3:** The XYZ coordinates in Ångströms of the molecular structure of **1'** in the low-spin state optimized by DFT. The charge of the compound was 0, the spin multiplicity was 1.

**Table S4:** The XYZ coordinates in Ångströms of the molecular structure of **1'** in the high-spin state optimized by DFT. The charge of the compound was 0, the spin multiplicity was 5..

**Table S5:** The XYZ coordinates in Ångströms of the molecular structure of  $[\text{Fe}(\text{DAPP})(\text{abpt})]^{2+}$  in the low-spin state optimized by DFT. The charge of the compound was +2, the spin multiplicity was 1.

**Table S6:** The XYZ coordinates in Ångströms of the molecular structure of  $[\text{Fe}(\text{DAPP})(\text{abpt})]^{2+}$  in the high-spin state optimized by DFT. The charge of the compound was +2, the spin multiplicity was 5.

**Table S7:** The list of calculated frequencies for DFT optimized molecular structures in Tables S2-S7.

**Table S8:** The list of TPSSh calculated values of the electron density at the iron nucleus ( $\rho_0^{\text{TPSSh}}$ ) and the quadrupole splitting ( $\Delta E_Q^{\text{TPSSh}}$ ) for DFT optimized molecular structures in Tables S3-S7.

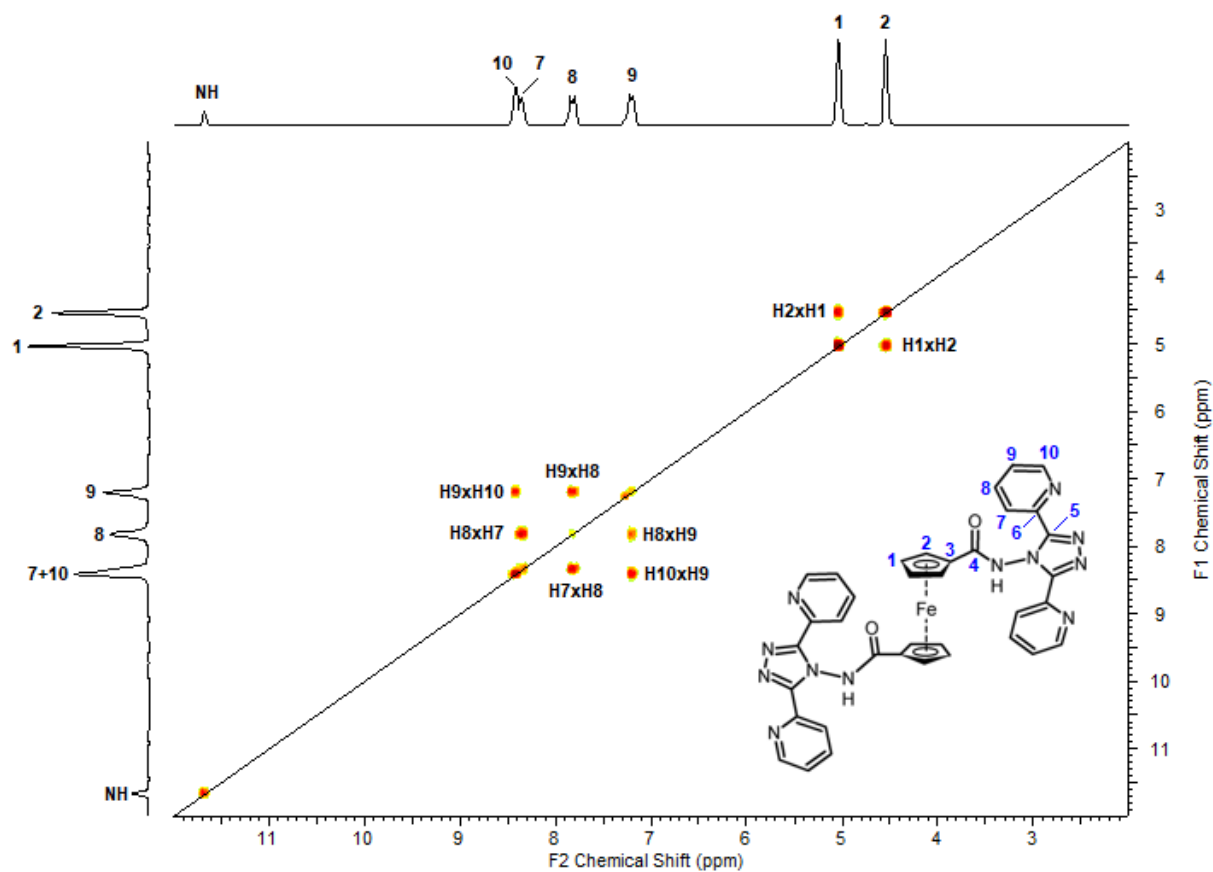

**Figure S1:**  $^1\text{H}$ - $^1\text{H}$  gs-COSY NMR spectrum (400 MHz,  $\text{CDCl}_3$ ) of **L** (bis(*N*-4-[3,5-di-(2-pyridyl)-1,2,4-triazoyl]ferrocene carboxamide).

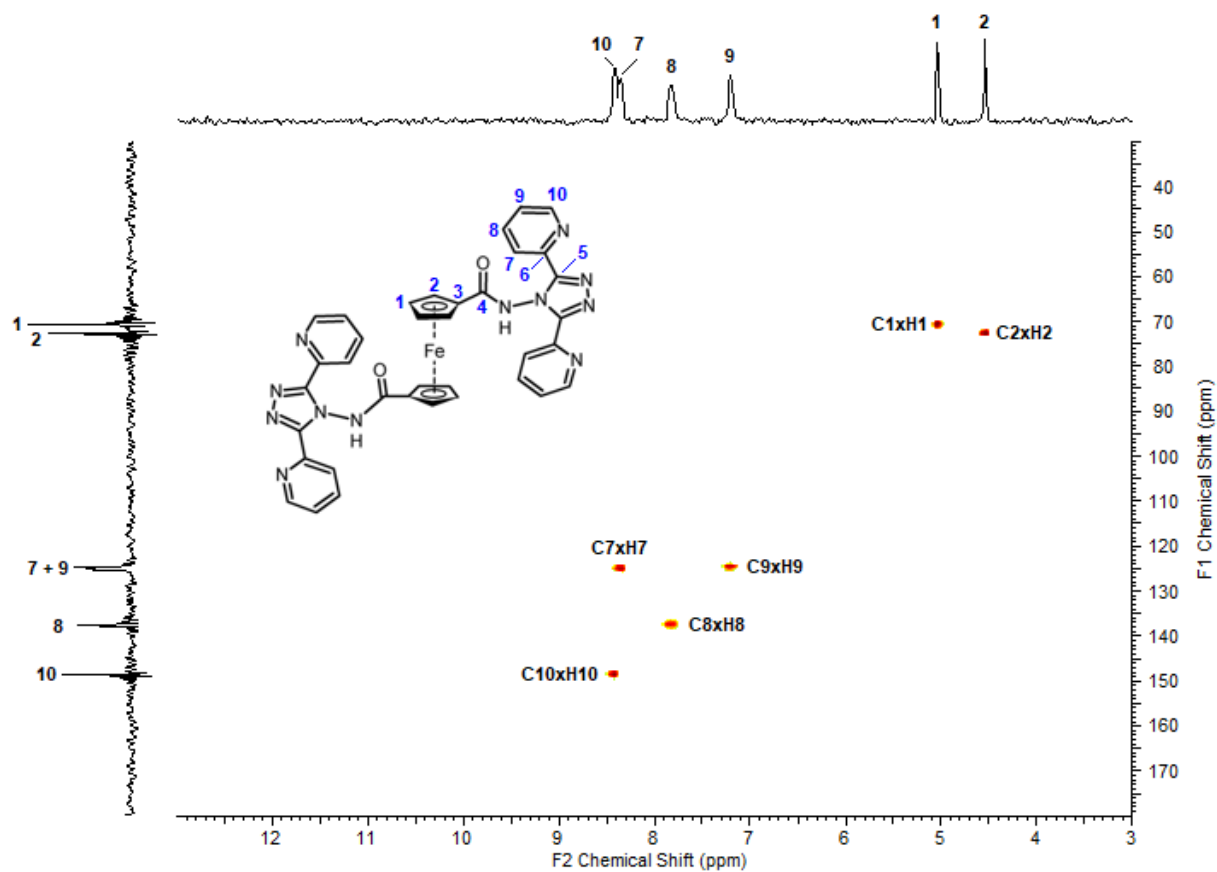

**Figure S2:**  $^1\text{H}$ - $^{13}\text{C}$  gs-HMQC NMR spectrum (400 MHz,  $\text{CDCl}_3$ ) of **L** (bis(*N*-4-[3,5-di-(2-pyridyl)-1,2,4-triazoyl])ferrocene carboxamide).

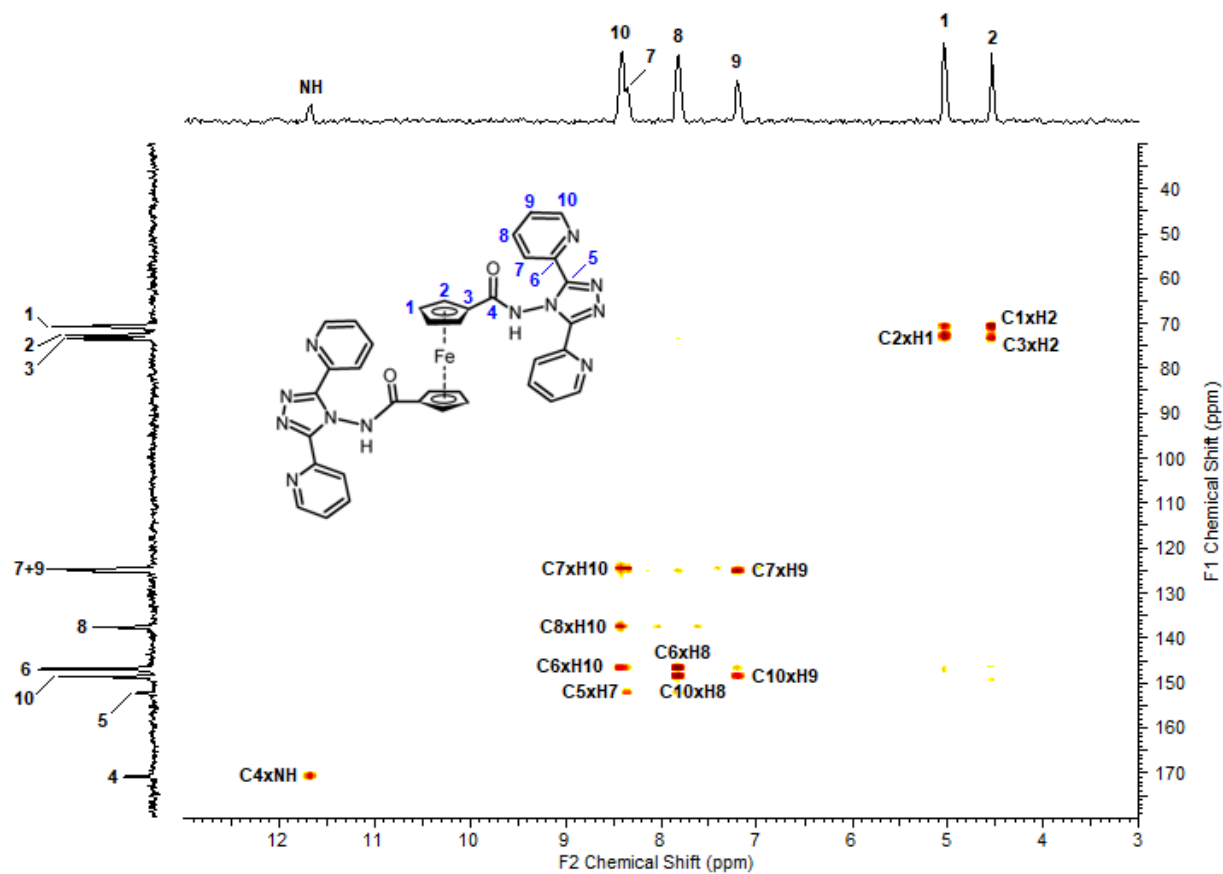

**Figure S3:**  $^1\text{H}$ - $^{13}\text{C}$  g-HMBC NMR spectrum 400 MHz,  $\text{CDCl}_3$ ) of **L** (bis(*N*-4-[3,5-di-(2-pyridyl)-1,2,4-triazoyl])ferrocene carboxamide).

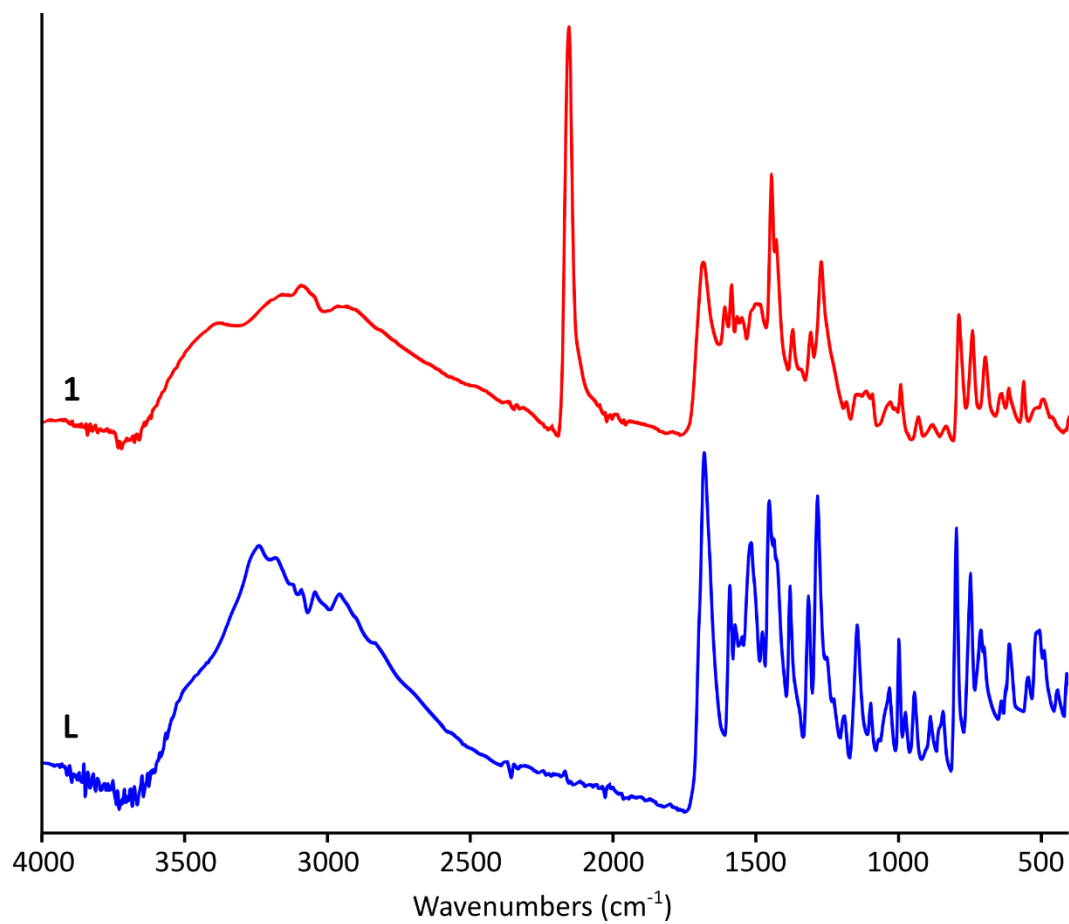

**Figure S4:** Comparison of FTIR spectra of studied ligand **L** (blue) and complex **1** (red).

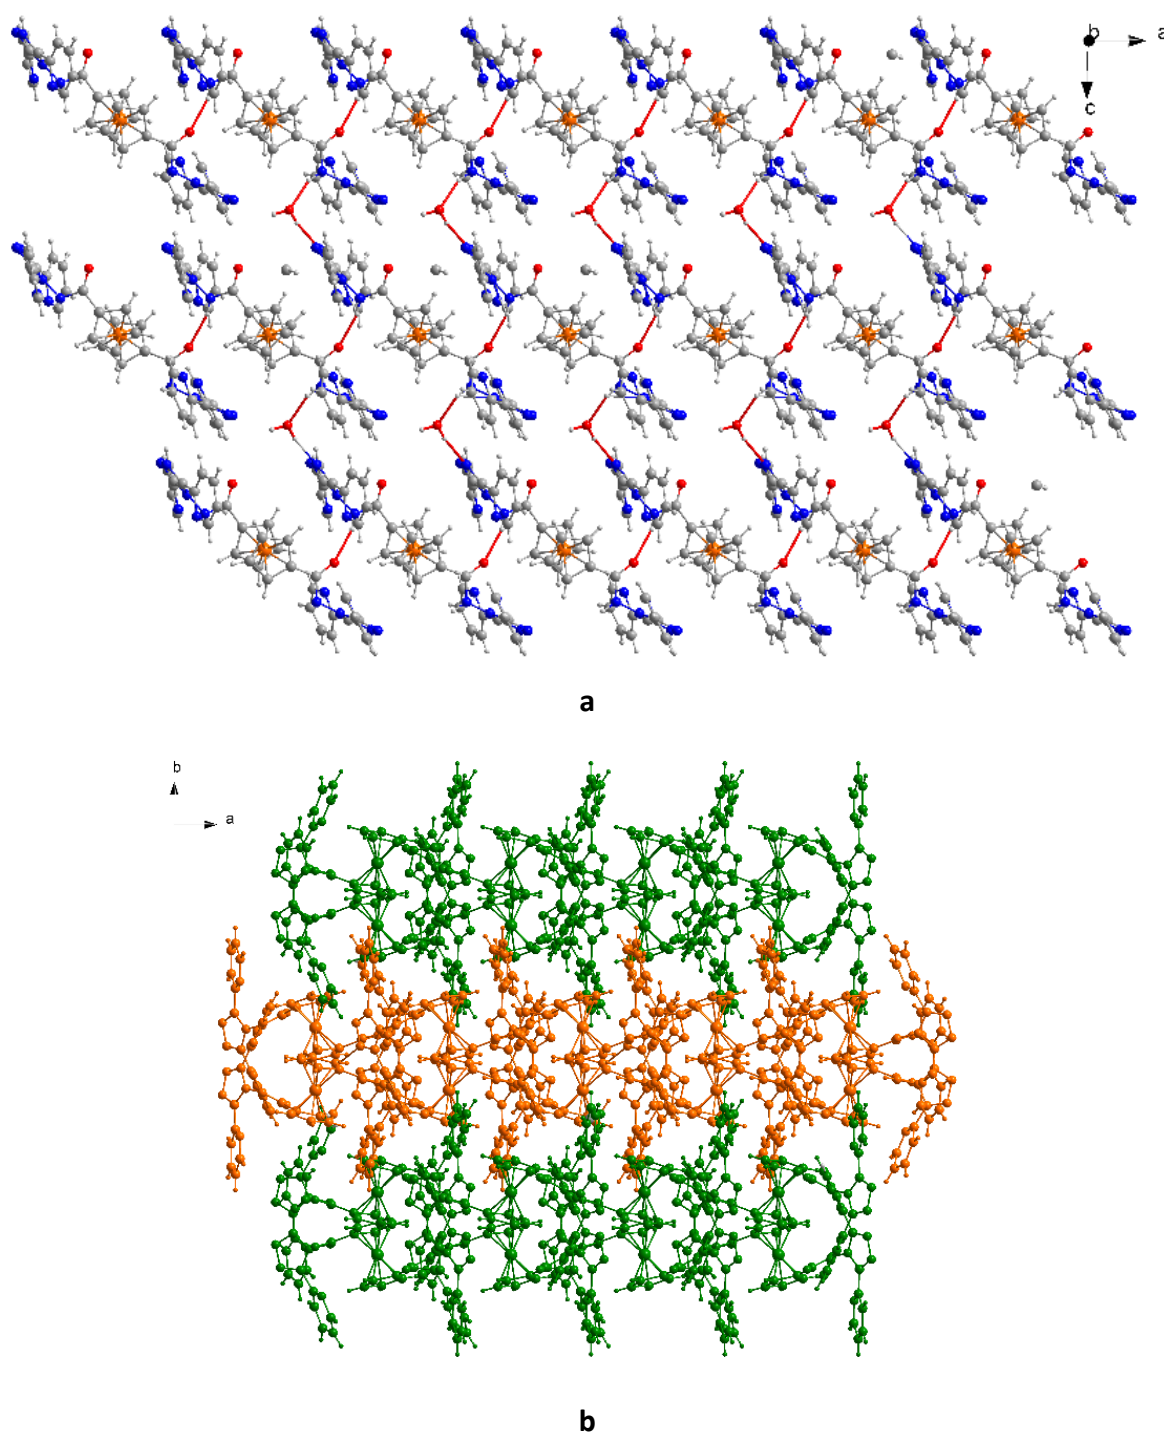

**Figure S5:** a) Representation of the two-dimensional hydrogen-bonding network in the crystal structure of **L**. The network of interconnected neighboring molecules of **L** is parallel with the plane *ac*. b) Representation of the final three-dimensional network created by interconnection of layers by C–H⋯ $\pi$  interactions. The layers are colored for clarity (orange and green).

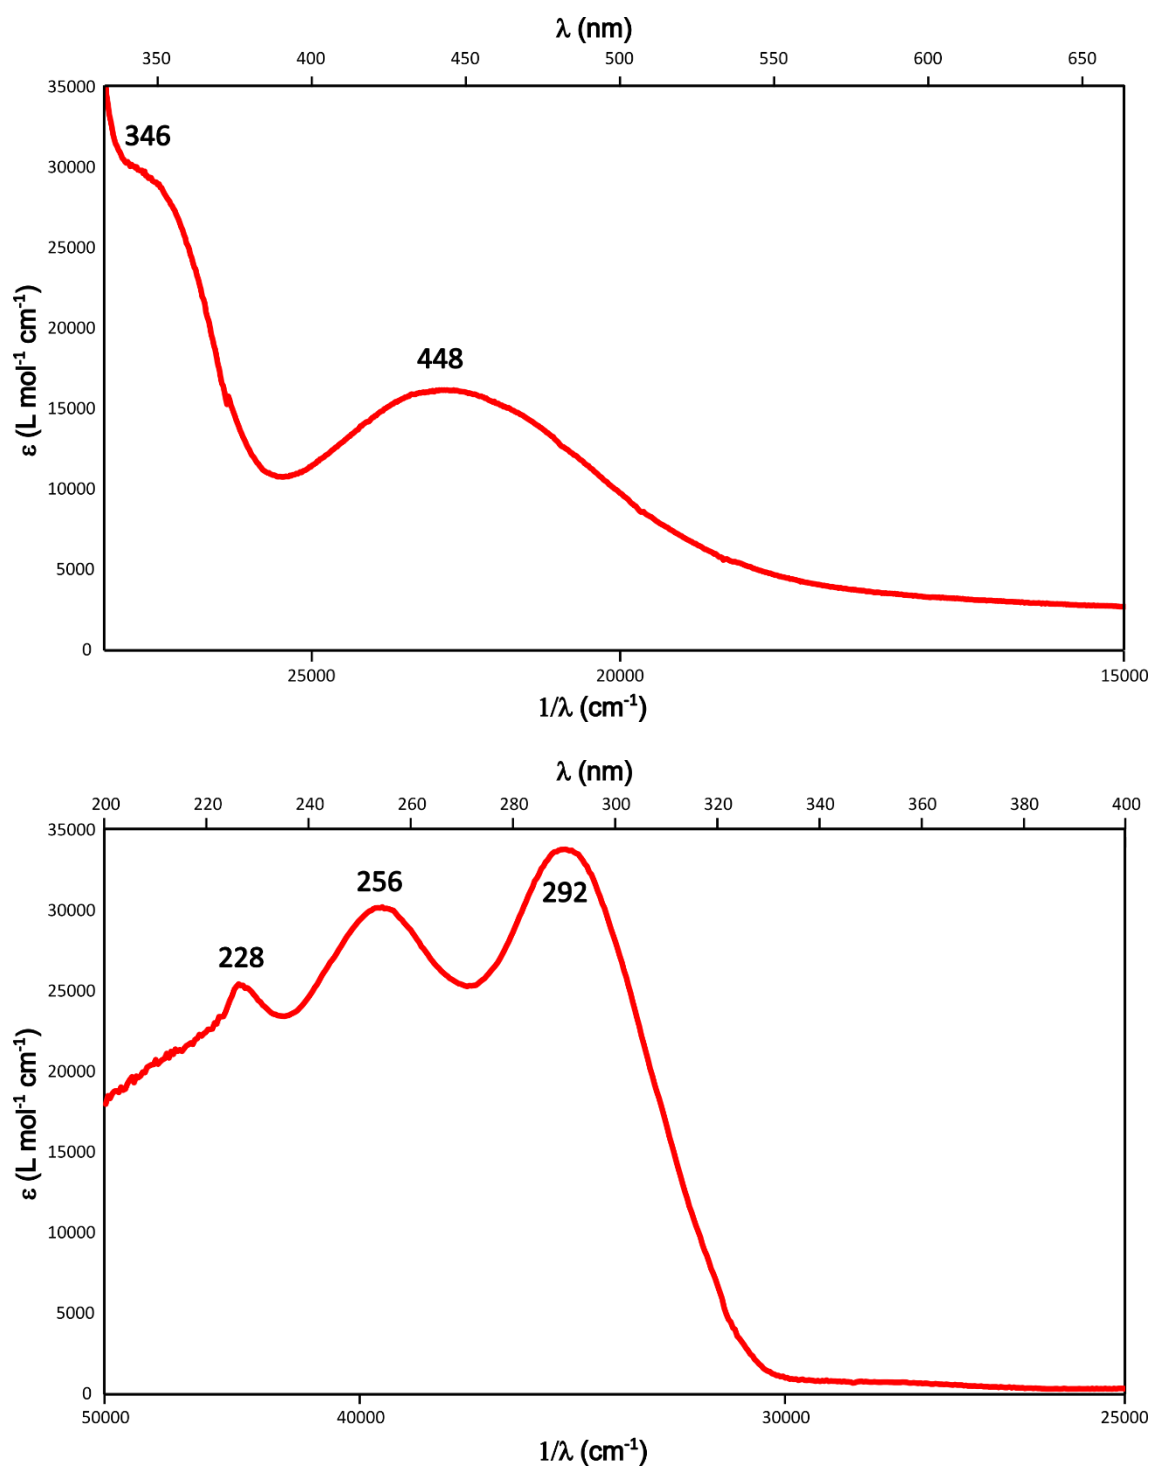

**Figure S6:** The UV-Vis absorption spectrum of ligand L in DCM solution with molar concentrations  $c = 2.1$  mmol/dm<sup>3</sup> (*top*) and  $c = 43.2$  µmol/dm<sup>3</sup> (*bottom*).



**Table S1:** Crystal data and structure refinements for **L**.

|                                         |                                                                                |
|-----------------------------------------|--------------------------------------------------------------------------------|
| Formula                                 | C <sub>36</sub> H <sub>28</sub> Fe <sub>1</sub> N <sub>12</sub> O <sub>3</sub> |
| $M_r$                                   | 732.55                                                                         |
| Color                                   | light orange                                                                   |
| Crystal system                          | monoclinic                                                                     |
| Space group (space group no.)           | $P2_1/c$ (14)                                                                  |
| $a$ (Å)                                 | 7.8354(3)                                                                      |
| $b$ (Å)                                 | 19.2990(7)                                                                     |
| $c$ (Å)                                 | 22.5050(12)                                                                    |
| $\alpha$ (°)                            | 90                                                                             |
| $\beta$ (°)                             | 90.709(5)                                                                      |
| $\gamma$ (°)                            | 90                                                                             |
| $U$ (Å <sup>3</sup> )                   | 3402.8(3)                                                                      |
| $Z$                                     | 4                                                                              |
| $\lambda$ (Å), Cu K $\alpha$            | 1.54184                                                                        |
| $D_{\text{calc}}$ (g·cm <sup>-3</sup> ) | 1.430                                                                          |
| $\mu$ (mm <sup>-1</sup> )               | 4.025                                                                          |
| $F$ (000)                               | 1512                                                                           |
| Reflection collected                    | 15556                                                                          |
| Independent reflections                 | 5992<br>( $R_{\text{int}} = 0.0435$ )                                          |
| Data/restraints/parameters              | 5992/153/527                                                                   |
| Goodness-of-fit on $F^2$                | 1.169                                                                          |
| Final R indices [ $I > 2\sigma(I)$ ]    | $R_1 = 0.0892$<br>$wR_2 = 0.1722$                                              |
| R indices (all data)                    | $R_1 = 0.1597$<br>$wR_2 = 0.2007$                                              |
| CCDC no.                                | 2177052                                                                        |

**Table S2:** The XYZ coordinates in Ångströms of the molecular structure of **L** optimized by DFT. The charge of the compound was 0, the spin multiplicity was 1.

|    |                   |                   |                   |
|----|-------------------|-------------------|-------------------|
| Fe | 3.26745108170459  | 12.60462299047482 | 4.65514021158902  |
| O  | 6.28640965971098  | 12.75299190638555 | 7.13910726656723  |
| O  | 0.51506224751068  | 12.40753380934100 | 1.87585988468957  |
| N  | -1.57911095098134 | 13.22977661850076 | 3.42915249222346  |
| N  | 2.91552664165603  | 14.54275100744953 | 9.71648124241734  |
| N  | -0.35265257528073 | 12.85502189842584 | 3.96670960117574  |
| H  | -0.54394389513159 | 12.37394362869379 | 4.86756040617111  |
| N  | -3.16397951805303 | 14.13538024698879 | 2.20523186649533  |
| N  | 4.84707079398555  | 12.42348680235383 | 9.43781555788381  |
| N  | 4.24620239971401  | 12.70406653171155 | 8.21538527965241  |
| H  | 3.43328989295767  | 13.32209002393469 | 8.40629222571350  |
| N  | -1.94606644345532 | 11.42416969905667 | 5.64508354619860  |
| N  | -3.74448169001279 | 13.20098339061902 | 3.01872711835081  |
| N  | 6.10328554809402  | 11.58109250540997 | 11.03219391702422 |
| N  | 5.47009417758244  | 12.68467383418114 | 11.53568012345860 |
| N  | 0.19702382591695  | 15.45099046909754 | 2.46852876837388  |
| C  | 2.07301601813388  | 15.58173506326349 | 9.80346777140212  |
| H  | 1.35331757738421  | 15.68865945806041 | 8.98434137832695  |
| C  | 3.83113081551598  | 14.36357686305105 | 10.69742927932560 |
| C  | -0.92274356308579 | 15.09663832518571 | 1.80470607735845  |
| C  | 3.13610176513036  | 10.70395218413829 | 5.38809165100269  |
| H  | 3.55556231231988  | 10.38912061039888 | 6.34650011920970  |
| C  | 5.71874004016156  | 11.41122428095007 | 9.76590795065592  |
| C  | 3.03824888347671  | 16.29999972827307 | 11.88974969764494 |
| H  | 3.08555964480019  | 16.98837165503851 | 12.73933672412489 |
| C  | 5.08364943011303  | 13.01374323907849 | 7.13865210507677  |
| C  | -2.97896967177723 | 11.62992769581689 | 4.79433709596574  |
| C  | 2.09291097527261  | 16.48754982406692 | 10.87047404898608 |
| H  | 1.38379859040368  | 17.31987462164958 | 10.89871141347104 |
| C  | 1.83992168604081  | 11.28139752918662 | 5.19675282636225  |
| H  | 1.09140865053300  | 11.43220655149404 | 5.97608340213325  |
| C  | -4.33424854684691 | 9.99500410983069  | 5.93047758551828  |
| H  | -5.26803125122117 | 9.43536783685210  | 6.04314772048734  |
| C  | 2.79310014047840  | 14.58912686565220 | 4.58465059960992  |
| H  | 1.84789696458080  | 14.97805782078785 | 4.19856338787542  |
| C  | 0.78246645821744  | 16.89557951766147 | 0.62185913675813  |
| H  | 1.49605203380646  | 17.60433041786991 | 0.19104467046359  |
| C  | 3.82598437526098  | 10.70806582485261 | 4.12749922846467  |
| H  | 4.84708087426546  | 10.36236318117876 | 3.95782925417566  |
| C  | -1.25784108423703 | 15.61599266284536 | 0.53831985123316  |
| H  | -2.17767859289271 | 15.29513572815433 | 0.04285400282998  |
| C  | 2.95902234208006  | 11.28136038226167 | 3.14248358189086  |
| H  | 3.18161935796861  | 11.44369610535647 | 2.08737268204356  |
| C  | 4.37774873118312  | 13.63017094325176 | 5.99302129728300  |
| C  | -2.78763330672791 | 12.64572471055713 | 3.75516600217398  |
| C  | -4.19705442928111 | 10.93209489850703 | 4.90327160507141  |
| H  | -5.00477831289329 | 11.12889916521923 | 4.19392588254170  |
| C  | 3.02679777210333  | 14.15465868434609 | 5.92877080925978  |
| H  | 2.30531399114828  | 14.20364567059873 | 6.74582172240857  |

|   |                   |                   |                   |
|---|-------------------|-------------------|-------------------|
| C | 1.71849572828312  | 11.63549509081697 | 3.79537046881531  |
| C | -2.08728652329663 | 10.51763357785641 | 6.62248073586891  |
| H | -1.22344883760336 | 10.38175256138692 | 7.28248749507914  |
| C | 0.59561279294517  | 12.30319965359237 | 3.09944795660250  |
| C | 1.02292865655308  | 16.32796570130219 | 1.88036738860508  |
| H | 1.92425503620703  | 16.59340581601791 | 2.44618415526663  |
| C | 4.71543416444398  | 13.20138233488881 | 10.57170516145215 |
| C | 4.95527235746101  | 13.73773413288807 | 4.67168249410034  |
| H | 5.95736428542707  | 13.40741248541401 | 4.39636034770723  |
| C | -3.26150052965225 | 9.77854853323589  | 6.80814843650346  |
| H | -3.33022013215167 | 9.05041401693576  | 7.62144802910135  |
| C | -1.85462168883549 | 14.16621543931687 | 2.45980872298344  |
| C | 3.97567269355381  | 14.32886608747835 | 3.81066436711128  |
| H | 4.09460322580651  | 14.52045114151501 | 2.74291902574156  |
| C | 3.92614893402490  | 15.22432150625291 | 11.80760043244833 |
| H | 4.68144238279065  | 15.04272343726270 | 12.57631455678946 |
| C | -0.38620464612855 | 16.53057791564718 | -0.05932953475688 |
| H | -0.61410460449202 | 16.94741211519434 | -1.04551814189455 |
| N | 5.35239718034762  | 9.88185007426264  | 7.92545052312357  |
| C | 7.37986378888230  | 9.64941654204624  | 9.23145348116682  |
| H | 7.99856262683906  | 10.01832319767128 | 10.05336559107069 |
| C | 6.16059292143452  | 10.28678607545107 | 8.92705342275924  |
| C | 7.77257073831425  | 8.55557795177059  | 8.45519335686507  |
| H | 8.71730549843577  | 8.04257702770230  | 8.66150610132416  |
| C | 6.94085288471978  | 8.13540692423428  | 7.40884702116178  |
| H | 7.20925309857945  | 7.28671149687423  | 6.77261803449832  |
| C | 5.74463835964287  | 8.83186350855338  | 7.19000062610992  |
| H | 5.06542774013409  | 8.52919613637068  | 6.38372967527535  |

**Table S3:** The XYZ coordinates in Ångströms of the molecular structure of **1'** in the low-spin state optimized by DFT. The charge of the compound was 0, the spin multiplicity was 1.

|    |                   |                   |                   |
|----|-------------------|-------------------|-------------------|
| Fe | 1.79182146261960  | 14.45525408557916 | -3.93444468329017 |
| N  | 0.13628829290430  | 15.28954376618612 | -3.53954125659527 |
| N  | 3.44754433178615  | 13.62549527295553 | -4.33628148363713 |
| Fe | -0.61098378642670 | 18.13093021665578 | 2.38311893900849  |
| C  | -1.45708911013417 | 16.34397519025232 | 2.81023139561113  |
| H  | -2.26868655599978 | 15.87888370448432 | 2.24982723815220  |
| C  | -1.57832482780070 | 17.21439725069071 | 3.93899135423066  |
| H  | -2.51429014560801 | 17.54049331947162 | 4.39455866671430  |
| C  | -0.26230282157365 | 17.62643148528273 | 4.33866531207757  |
| H  | -0.02901080947579 | 18.32528108160748 | 5.14394054799616  |
| C  | 0.69320310688944  | 17.01768706331238 | 3.46529531134456  |
| H  | 1.77450010607213  | 17.15051810985397 | 3.51525126789708  |
| C  | -0.04537481554009 | 16.20565876313114 | 2.51441162868400  |
| C  | 0.44126554425057  | 15.61260822903893 | 1.26475403718976  |
| C  | 2.93104996776971  | 16.72885204234086 | -0.72774243171989 |
| C  | 2.04289776007177  | 14.77128803999378 | -1.19624489802716 |
| C  | 1.52152733842978  | 13.42533665521838 | -1.27787789083344 |
| C  | 1.25327122926487  | 12.56559777639385 | -0.20728767755444 |
| H  | 1.37022482083839  | 12.91593963809518 | 0.81966541360316  |
| C  | 0.85224560117879  | 11.25583967100493 | -0.48767474039753 |
| H  | 0.63896268638539  | 10.55917771973219 | 0.32749209744120  |
| C  | 0.73610655456769  | 10.85678944503954 | -1.82431474909952 |
| H  | 0.43063915603814  | 9.84213345781882  | -2.09181608976188 |
| C  | 1.01318736692559  | 11.77411586950016 | -2.84215982593551 |
| H  | 0.91762849682375  | 11.50628347672818 | -3.89565261501944 |
| C  | 3.41486115156696  | 17.87658680439178 | 0.03679273594506  |
| C  | 3.74717857109605  | 19.08577912662624 | -0.59930289597926 |
| H  | 3.63811099136983  | 19.18815555723043 | -1.68150122133334 |
| C  | 4.20281116819248  | 20.14337177677814 | 0.19334645841343  |
| H  | 4.46699469133531  | 21.10037466958021 | -0.26567228184746 |
| C  | 4.30333127557254  | 19.96385229447076 | 1.58049555167172  |
| H  | 4.64559407828028  | 20.77049372915482 | 2.23416882506329  |
| C  | 3.94527064971401  | 18.72384219815801 | 2.12461336841096  |
| H  | 4.00185486846847  | 18.54343949224331 | 3.20278742594598  |
| C  | -1.78377000449699 | 19.72025550965124 | 1.93561951073963  |
| H  | -2.69500355709606 | 20.00296649691917 | 2.46339623219483  |
| C  | -1.68865559173945 | 18.85098791441387 | 0.79988104025621  |
| H  | -2.52129707381295 | 18.34454799974840 | 0.31011914333396  |
| C  | -0.30346981229992 | 18.72818193396183 | 0.44380562532393  |
| H  | 0.10074779540515  | 18.10672314060125 | -0.35777180149086 |
| C  | 0.46789840547974  | 19.51602497331288 | 1.35500609417242  |
| H  | 1.54975956500807  | 19.63130911864612 | 1.34072232511337  |
| C  | -0.44552881343752 | 20.14129078611889 | 2.28525696046016  |
| C  | -0.11204609313138 | 20.96867674866964 | 3.47070290826435  |
| N  | 1.84557178265898  | 15.54423849616614 | 1.14272982031897  |
| H  | 2.42140686964979  | 16.20566433281325 | 1.69952793997623  |
| N  | 2.31850851086365  | 15.62077455564017 | -0.16615053713302 |
| N  | 3.03323006883110  | 16.55125849624152 | -2.04052178668451 |
| N  | 2.46117289768584  | 15.35246078792707 | -2.32519228696849 |

|    |                   |                   |                    |
|----|-------------------|-------------------|--------------------|
| N  | 1.39176782002311  | 13.03910276268751 | -2.58501660748766  |
| N  | 3.52117295089350  | 17.69592691436669 | 1.37494869103695   |
| O  | -0.29294799343283 | 15.17722237429841 | 0.37148610823231   |
| O  | -1.00754809489734 | 21.44872686588296 | 4.20576133111832   |
| N  | 1.20133468798265  | 21.19293468011344 | 3.70665085853778   |
| H  | -0.57937155924122 | 7.72799059087554  | -7.69425023739468  |
| C  | -0.39111777933200 | 8.71262144046877  | -8.13199162340820  |
| H  | -0.91295130274735 | 8.13071340268337  | -10.16666705616704 |
| C  | -0.57668048442871 | 8.93243160711654  | -9.50379879178038  |
| C  | 0.04859630493566  | 9.76755411725394  | -7.32672675251838  |
| H  | 0.21902252115811  | 9.63745837529893  | -6.25536756763005  |
| H  | 1.16645004960992  | 12.77287197451602 | -9.59649762045202  |
| H  | 2.64282858362726  | 17.40990632978738 | -3.95773833365335  |
| C  | 2.52628309936359  | 17.15391894286562 | -5.01183964379243  |
| C  | 0.27759222131985  | 11.01297235624643 | -7.93582368895618  |
| C  | 3.64222333907922  | 12.93006248566086 | -10.45032036998921 |
| C  | 5.58282980255618  | 9.53318258981318  | -10.07259275747237 |
| C  | 3.29039326404026  | 9.42796742213828  | -9.68736954445267  |
| C  | 6.93384177947719  | 9.45856732582982  | -10.68340651392824 |
| H  | 6.02222518437243  | 10.83673223179365 | -8.27979606079595  |
| C  | 5.29046896712944  | 10.29464161119210 | -8.87846907350825  |
| N  | 2.16870178873749  | 15.88462332565516 | -5.27783056499656  |
| C  | 3.13678762196909  | 13.40947628042836 | -9.15942714182439  |
| H  | 3.34116111588466  | 10.71825982201107 | -7.83768969320513  |
| H  | 4.19412978285335  | 8.39901830768445  | -11.47271277293711 |
| C  | 2.01406303329846  | 15.51491457778639 | -6.58656695289920  |
| C  | 0.72019444171256  | 12.16820901021646 | -7.15774310376575  |
| C  | 1.52217826303185  | 14.15868857406787 | -6.67602475525104  |
| H  | 6.17562731060836  | 11.87612932842061 | -12.41835753036487 |
| N  | 0.09785210432224  | 11.23092893239561 | -9.26017494397701  |
| C  | 4.33174968998191  | 9.00313801213415  | -10.57457600244380 |
| C  | 3.88016562706903  | 10.22035848329518 | -8.64604946958077  |
| N  | 1.73368838819955  | 13.42599360295092 | -9.02386396894079  |
| C  | 2.23797528259536  | 16.39489543757052 | -7.65096242658470  |
| H  | 2.22949623400005  | 9.20519134970910  | -9.80128085507051  |
| C  | 5.22223417115395  | 12.12399482132693 | -11.94846313655917 |
| H  | 5.84797605120875  | 13.33492565600448 | -10.14555085010121 |
| H  | 3.72912985256169  | 11.06450308344065 | -13.26599418021938 |
| H  | 2.10162240535933  | 16.05699750152439 | -8.67974848971616  |
| Fe | 4.29680402529192  | 11.02942644458936 | -10.48518450435102 |
| C  | 5.05940511886361  | 12.88421318287541 | -10.74875265022619 |
| C  | 2.75957933514707  | 18.09106368045981 | -6.02254384649618  |
| C  | 2.61905221933644  | 17.70864943292585 | -7.36163384112638  |
| N  | 0.61706679703163  | 12.32934334173427 | -5.84328936153603  |
| H  | 3.05044814521924  | 19.10800198996878 | -5.74755325600096  |
| N  | 1.27673409366711  | 13.30825248214117 | -7.71284454547405  |
| H  | -0.43238635941540 | 10.41756680122874 | -11.08907912517818 |
| H  | 2.79736142118408  | 18.42114814058016 | -8.17148282664990  |
| N  | 1.13367204533328  | 13.55264388471188 | -5.55047385208669  |
| C  | -0.31093702733801 | 10.20628643802302 | -10.02169785828434 |
| C  | 3.92888201243711  | 11.68779054189470 | -12.39319583968587 |
| C  | 2.94431602775051  | 12.17201197030728 | -11.47358566829174 |

|   |                   |                   |                    |
|---|-------------------|-------------------|--------------------|
| O | 3.86345589457492  | 13.80756230807581 | -8.24250590550065  |
| O | 7.90899714688113  | 10.06833217163991 | -10.18327695875933 |
| N | 7.06469614924309  | 8.69340487569211  | -11.79004030329350 |
| H | 1.87034636535130  | 11.99403959580437 | -11.54011109818189 |
| C | -0.72151381551115 | 15.92477295091895 | -3.05977151090451  |
| C | 4.30078075823101  | 13.01050329252301 | -4.84975625131976  |
| C | -1.73985889430700 | 16.71938471405237 | -2.51456721146281  |
| C | 5.30851678818788  | 12.23557605500292 | -5.44040229890213  |
| C | 6.31454417486092  | 12.84407300258288 | -6.22529836595341  |
| C | 5.27176856462968  | 10.82970412363254 | -5.29216533077646  |
| C | -1.74024957175710 | 18.11000219546969 | -2.77048322488067  |
| C | -2.72191057863798 | 16.15248463284264 | -1.67047989495864  |
| N | -3.53987115629851 | 15.68519683899764 | -0.97019587909724  |
| N | -1.73467943776098 | 19.26348403025100 | -2.98885979391783  |
| N | 7.15063445791492  | 13.34716436788036 | -6.87785254773471  |
| N | 5.23392863563490  | 9.66364728931899  | -5.16163373118956  |
| H | 7.96377929920681  | 8.65556439118233  | -12.25824981484830 |
| H | 6.27637976213391  | 8.22020843056367  | -12.21521433462809 |
| H | 1.93120819397879  | 20.75227050776756 | 3.15830319439581   |
| H | 1.46828953747361  | 21.71201511698955 | 4.53623650796093   |

**Table S4:** The XYZ coordinates in Ångströms of the molecular structure of **1'** in the high-spin state optimized by DFT. The charge of the compound was 0, the spin multiplicity was 5.

|    |                   |                   |                   |
|----|-------------------|-------------------|-------------------|
| Fe | 1.78042170464836  | 14.53280729019486 | -3.99276394124730 |
| N  | 0.04412847603938  | 15.71872672720887 | -3.93219097055860 |
| N  | 3.52877626923488  | 13.36637684424737 | -4.04470474471824 |
| Fe | -0.75167632997886 | 18.39803052308083 | 2.88849816062979  |
| C  | -1.71531657072353 | 16.62278752941332 | 3.01749925656698  |
| H  | -2.55909902486846 | 16.30732096673228 | 2.40338753840581  |
| C  | -1.77388159847156 | 17.29492701954034 | 4.27919509920305  |
| H  | -2.68433365317698 | 17.59813502590939 | 4.79802988907968  |
| C  | -0.43177638763326 | 17.54652580234831 | 4.72213490056108  |
| H  | -0.14762716396403 | 18.08339188899532 | 5.62906101989265  |
| C  | 0.47685616215375  | 17.03361517443486 | 3.74310785439019  |
| H  | 1.56447282091253  | 17.09110585385237 | 3.79897362275767  |
| C  | -0.31765443863161 | 16.44390055077771 | 2.68007689158955  |
| C  | 0.12936536693271  | 15.97675187165065 | 1.36187338566650  |
| C  | 2.70932450938033  | 16.97318817265619 | -0.59515126900291 |
| C  | 1.80873177604940  | 15.02262442044364 | -1.09456258624610 |
| C  | 1.18560582541083  | 13.70349976053715 | -1.13620042467427 |
| C  | 0.81691417878357  | 12.94313438436593 | -0.01892474344190 |
| H  | 0.95872999587544  | 13.33334593652507 | 0.99029463643369  |
| C  | 0.28279501520571  | 11.66675433378361 | -0.22932125878583 |
| H  | -0.01045035657528 | 11.04918035343485 | 0.62409840771258  |
| C  | 0.13420528686556  | 11.19553465010957 | -1.53918176197585 |
| H  | -0.27965631113641 | 10.20506620792641 | -1.74484501327364 |
| C  | 0.52738213461938  | 12.01643180581384 | -2.60123075359898 |
| H  | 0.43247231221601  | 11.69256005676734 | -3.64138917926710 |
| C  | 3.20711577470335  | 18.09152566250578 | 0.20962866923461  |
| C  | 3.51616651462884  | 19.33316520746726 | -0.36947171474135 |
| H  | 3.34977298916207  | 19.50206815562160 | -1.43574594427896 |
| C  | 4.02949322900735  | 20.33583860667309 | 0.46006637108434  |
| H  | 4.27892174101257  | 21.31726968988733 | 0.04658764055548  |
| C  | 4.20946166769665  | 20.06839690128137 | 1.82412824824123  |
| H  | 4.60146040959467  | 20.82857115990895 | 2.50511786272088  |
| C  | 3.86229980007139  | 18.80179666988029 | 2.31193378274981  |
| H  | 3.97564484212676  | 18.55476234340363 | 3.37237991648077  |
| C  | -1.76257389627541 | 20.15056788224192 | 2.77378282481637  |
| H  | -2.61937650167806 | 20.43159300511829 | 3.38681657448056  |
| C  | -1.80079741533072 | 19.48279689329866 | 1.50624300797265  |
| H  | -2.69834521964941 | 19.15298357793898 | 0.98207058798872  |
| C  | -0.44979842659574 | 19.27982724408086 | 1.06578052475442  |
| H  | -0.13506605816642 | 18.75561233693379 | 0.16254918673255  |
| C  | 0.43287165984175  | 19.82027833414195 | 2.05289923212870  |
| H  | 1.51968699296258  | 19.81449873626688 | 2.00350237632915  |
| C  | -0.37543088203586 | 20.36789853167148 | 3.11939608712555  |
| C  | 0.08667109890366  | 20.93789443433478 | 4.40874633143345  |
| N  | 1.52157649889362  | 15.82769984784372 | 1.23174490051900  |
| H  | 2.15079170841814  | 16.39920772688554 | 1.82517118966547  |
| N  | 2.01803514874860  | 15.89450197162551 | -0.06589850402410 |
| N  | 2.92093020683518  | 16.76127823019561 | -1.88691840757579 |
| N  | 2.35461526010932  | 15.55720491240351 | -2.18899631548581 |

|    |                   |                   |                    |
|----|-------------------|-------------------|--------------------|
| N  | 1.03875289910238  | 13.24259108706031 | -2.40844371096758  |
| N  | 3.37887040631629  | 17.82802346468164 | 1.52688686278034   |
| O  | -0.62916732808043 | 15.68392502698787 | 0.43065531230784   |
| O  | -0.72500550751783 | 21.34691554695074 | 5.27296453908692   |
| N  | 1.42432356184157  | 21.00263651373262 | 4.59962869791249   |
| H  | -0.27776518039630 | 7.51185885001521  | -7.77000306903079  |
| C  | -0.02724184759828 | 8.47072627727719  | -8.23297535072654  |
| H  | -0.39216135071762 | 7.80850298114540  | -10.27681379128448 |
| C  | -0.09149008809543 | 8.63183681042829  | -9.62338980082323  |
| C  | 0.36850917350755  | 9.55247335543596  | -7.43984917144341  |
| H  | 0.43956808180728  | 9.46956095807381  | -6.35316381941767  |
| H  | 1.73857108014423  | 12.43194033746925 | -9.73282749777001  |
| H  | 3.00248754099285  | 17.42573265269649 | -4.39479106759806  |
| C  | 2.94075714468941  | 17.07105231353061 | -5.42721333304893  |
| C  | 0.68239462342174  | 10.76139208401411 | -8.08187514969914  |
| C  | 4.24900962542922  | 12.60102003818710 | -10.47491982920645 |
| C  | 6.06029557694137  | 9.10836899097723  | -10.39696372588967 |
| C  | 3.74956940189398  | 9.05015484681270  | -10.13451027068774 |
| C  | 7.43641154841475  | 9.04908050544125  | -10.95042939455247 |
| H  | 6.44840491839424  | 10.18713840911376 | -8.44750298873118  |
| C  | 5.73341154262081  | 9.74193509171500  | -9.13902633942453  |
| N  | 2.49402431173824  | 15.81657465064402 | -5.59650236688012  |
| C  | 3.69103965760106  | 13.02896076468846 | -9.18542288596016  |
| H  | 3.74419617869960  | 10.13196840436789 | -8.15759592657876  |
| H  | 4.70726080621951  | 8.19425713518602  | -11.98119798388717 |
| C  | 2.38745693934640  | 15.31901295118019 | -6.85886604237951  |
| C  | 1.06339305604573  | 11.95128610322766 | -7.31941536405316  |
| C  | 1.82212785111417  | 13.97341634876171 | -6.87419053415129  |
| H  | 6.82872314852442  | 11.67408635472916 | -12.44745329030369 |
| N  | 0.62276968040239  | 10.92219154444040 | -9.42486575263518  |
| C  | 4.81968558965543  | 8.68744652980848  | -11.01434354224927 |
| C  | 4.31071530796959  | 9.69953160102796  | -8.98400968052561  |
| N  | 2.28748536310697  | 13.08041797339401 | -9.13691171715709  |
| C  | 2.73866552326674  | 16.06719501470633 | -7.98981852238836  |
| H  | 2.68910757906176  | 8.88402910995686  | -10.32244115228746 |
| C  | 5.86448627396044  | 11.90315800204049 | -11.99026951138181 |
| H  | 6.45111473845559  | 12.89781136956732 | -10.04793127893307 |
| H  | 4.39556141640711  | 11.04348169789146 | -13.47080876124497 |
| H  | 2.63090116003139  | 15.64613574742271 | -8.99107101609503  |
| Fe | 4.84536779502638  | 10.69025870416567 | -10.69449247411461 |
| C  | 5.67467171814483  | 12.53623373391814 | -10.72226566068112 |
| C  | 3.31271162074812  | 17.88278629696761 | -6.50385156383732  |
| C  | 3.21006028591323  | 17.37182357821142 | -7.80336192303884  |
| N  | 0.76385633551682  | 12.21510079931832 | -6.05495651519437  |
| H  | 3.67516881654172  | 18.89694816335221 | -6.31761989008688  |
| N  | 1.72394938715482  | 13.04073982118618 | -7.86551161599409  |
| H  | 0.22283166721046  | 10.03942607687392 | -11.25460878241423 |
| H  | 3.48912401928802  | 17.98123187464038 | -8.66734967641906  |
| N  | 1.24196550114882  | 13.46405792160444 | -5.78508481671884  |
| C  | 0.24950756090776  | 9.87432894343477  | -10.17268717568219 |
| C  | 4.57797782531629  | 11.56270055530087 | -12.52880745976272 |
| C  | 3.57162250175244  | 11.98008542472174 | -11.59944823949112 |



|   |                   |                   |                    |
|---|-------------------|-------------------|--------------------|
| O | 4.37504443504191  | 13.37748845353196 | -8.21643052331230  |
| O | 8.40653956922098  | 9.56029926753133  | -10.34163766778016 |
| N | 7.59517639906889  | 8.40715924139602  | -12.12960258686854 |
| H | 2.49604696368721  | 11.84894522380137 | -11.72485492652836 |
| C | -0.37179794033904 | 16.63662724963941 | -3.32466369820925  |
| C | 4.03680634233576  | 12.47208347660125 | -4.61417284488241  |
| C | -0.83309692645673 | 17.74473878941521 | -2.61010797384010  |
| C | 4.61808890203208  | 11.39056508147994 | -5.28196555774708  |
| C | 5.86733792796581  | 11.54831737534089 | -5.92662554189397  |
| C | 3.93879277843268  | 10.14976309565953 | -5.31266788580312  |
| C | -2.02823334296370 | 17.65864004219433 | -1.85684782230552  |
| C | -0.08356529808506 | 18.94501057588820 | -2.63988067795162  |
| N | 0.54443096504699  | 19.93519604896536 | -2.66223770110416  |
| N | -3.02859112494740 | 17.58745579122161 | -1.24995428667087  |
| N | 6.91252109884254  | 11.68271476276522 | -6.44063808406640  |
| N | 3.36920107666639  | 9.12502234869618  | -5.33895146397741  |
| H | 6.81447069776016  | 8.00705887135319  | -12.63612461779901 |
| H | 8.51478305646105  | 8.38243466327275  | -12.55698823366381 |
| H | 2.08669976687050  | 20.64796046511950 | 3.91938646734205   |
| H | 1.77843207181376  | 21.35637862525196 | 5.48189120280583   |

**Table S5:** The XYZ coordinates in Ångströms of the molecular structure of [Fe(DAPP)(abpt)]<sup>2+</sup> in the low-spin state optimized by DFT. The charge of the compound was +2, the spin multiplicity was 1.

|    |                   |                   |                   |
|----|-------------------|-------------------|-------------------|
| Fe | 0.46144985010774  | 3.80254145683909  | 10.50853020181794 |
| N  | 2.06139887674299  | 3.54375220461022  | 11.82571028566010 |
| N  | -0.78179419619453 | 4.68910956227892  | 11.85579639229291 |
| H  | -0.92218370285676 | 5.63375287564888  | 11.48474225316091 |
| H  | -1.69695639713516 | 4.23462017275131  | 11.79513658984822 |
| N  | -0.36239121541499 | 2.02626986903868  | 11.01974437023971 |
| H  | -0.84053885035214 | 2.13622398579004  | 11.91983487271064 |
| H  | -1.10045239191821 | 1.82032323720892  | 10.34042100734731 |
| N  | 1.27247999836270  | 5.54633120613317  | 10.19999317067203 |
| N  | -0.95575548054016 | 3.99021927844194  | 9.11350938967106  |
| N  | 1.41599197908807  | 3.01953606050881  | 9.00173196626121  |
| N  | 1.46762792440075  | 2.37240485503132  | 6.90306387145006  |
| N  | 2.66339585718219  | 2.53564761247081  | 8.75846894673243  |
| N  | 3.68435299361299  | 1.07355858511481  | 5.56976536327904  |
| N  | 1.04576011301690  | 2.04798775228563  | 5.59589773704109  |
| H  | 0.88506334985394  | 2.93600542539357  | 5.10685947941297  |
| H  | 1.87876936573143  | 1.59854568934197  | 5.17478481630185  |
| C  | 1.87225364237014  | 3.93809136010366  | 13.26925027795359 |
| H  | 2.88061279851396  | 4.08465148129162  | 13.69539943280056 |
| H  | 1.41945274174133  | 3.07729733157632  | 13.78224019107357 |
| C  | 0.99479157429727  | 5.15285479782475  | 13.53178030386865 |
| H  | 1.13058565598223  | 5.42290351461776  | 14.59320361716578 |
| H  | 1.30463896146097  | 6.03310795194288  | 12.94206630045249 |
| C  | -0.47303492956728 | 4.83329908029516  | 13.30752751292287 |
| H  | -0.72486770242359 | 3.87915580253240  | 13.79781307109837 |
| H  | -1.12248862593679 | 5.61606901350398  | 13.73436087500969 |
| C  | 0.52897405514555  | 0.83852783050836  | 11.11847683028751 |
| H  | 0.97950424263621  | 0.67407985973874  | 10.12750138916161 |
| H  | -0.07404979547653 | -0.05165979104096 | 11.36857605744453 |
| C  | 1.60027821306397  | 1.04956878122394  | 12.17906150843423 |
| H  | 1.11908690877401  | 1.22783453900100  | 13.15791683287547 |
| H  | 2.16828606999016  | 0.10888895744628  | 12.28324986903295 |
| C  | 2.61461707486972  | 2.13872761686453  | 11.84483886032448 |
| H  | 3.44408497344509  | 2.11798175303085  | 12.57567457760812 |
| H  | 3.03723255606162  | 1.94948591647758  | 10.84960500794943 |
| C  | 0.66874900223139  | 6.62009712977552  | 9.64030178105869  |
| H  | -0.34124378508809 | 6.46736728221862  | 9.25596813538414  |
| C  | 1.29305666126326  | 7.86434024064134  | 9.55011520405772  |
| H  | 0.76017906095333  | 8.69884967799661  | 9.08680408745754  |
| C  | 2.58877090367694  | 8.01506069835081  | 10.06022900294142 |
| H  | 3.10296439646859  | 8.97918440725156  | 10.01024641895811 |
| C  | 3.21284441488588  | 6.90410869306478  | 10.64234143758761 |
| H  | 4.22083728392635  | 6.97150633872133  | 11.06036142139607 |
| C  | 2.53246574001373  | 5.68558226718555  | 10.69262691270432 |
| C  | 3.12431545478535  | 4.41967407723075  | 11.22564414651993 |
| H  | 3.92601844339039  | 4.62015673549692  | 11.95568296785112 |
| H  | 3.56193135208471  | 3.86125600286432  | 10.38257765184214 |
| C  | -2.18619438361345 | 4.53946223725552  | 9.23856158477269  |

|   |                   |                   |                   |
|---|-------------------|-------------------|-------------------|
| H | -2.43289149962524 | 5.00306524906132  | 10.19287208319053 |
| C | -3.13567452063126 | 4.55231652437612  | 8.21633016038695  |
| H | -4.10605479843741 | 5.01980508006157  | 8.40161772681268  |
| C | -2.82628268657490 | 3.96899037724584  | 6.98128440647829  |
| H | -3.55070042318600 | 3.95792428002516  | 6.16266093520015  |
| C | -1.56045577186527 | 3.40282380326134  | 6.81640590950215  |
| H | -1.26860725602306 | 2.93833957096727  | 5.87354695032357  |
| C | -0.65591456782415 | 3.43093896784325  | 7.88730482890805  |
| C | 0.68671858143175  | 2.91878350827302  | 7.87902844495289  |
| C | 2.69560571758660  | 2.14385523211649  | 7.48189043802660  |
| C | 3.86247267280370  | 1.55952480647201  | 6.82165855086580  |
| C | 4.74146869450321  | 0.53388088064929  | 4.94369195114439  |
| H | 4.55794471259917  | 0.15529203539830  | 3.93257504494592  |
| C | 6.01135335601220  | 0.44307125319913  | 5.52401579276150  |
| H | 6.83748673470439  | -0.01012912187504 | 4.96938216231429  |
| C | 6.19104235559414  | 0.94373412207030  | 6.82125081876281  |
| H | 7.16880649361791  | 0.89264001131053  | 7.30944370289400  |
| C | 5.10332452408902  | 1.51445425709303  | 7.48587515036596  |
| H | 5.20192764761050  | 1.92190474856921  | 8.49462696026483  |

**Table S6:** The XYZ coordinates in Ångströms of the molecular structure of [Fe(DAPP)(abpt)]<sup>2+</sup> in the high-spin state optimized by DFT. The charge of the compound was +2, the spin multiplicity was 5.

|    |                   |                   |                   |
|----|-------------------|-------------------|-------------------|
| Fe | 0.29194250978439  | 3.60373689959227  | 10.64880460015837 |
| N  | 2.12274634373492  | 3.52261929943690  | 11.91219547836122 |
| N  | -1.00055919364701 | 4.73450785320366  | 11.98109828819051 |
| H  | -1.09570694576346 | 5.66490045446364  | 11.56349227335291 |
| H  | -1.94637321221975 | 4.34486112859768  | 12.01321010042365 |
| N  | -0.41500461843056 | 1.75551628977741  | 11.52265629541827 |
| H  | -0.78706345028662 | 1.93632368017266  | 12.45978812175326 |
| H  | -1.20483178919023 | 1.42721930144534  | 10.96176060915168 |
| N  | 1.24050617407984  | 5.48215560957184  | 10.11599256380286 |
| N  | -1.12541601049334 | 3.79184564521924  | 8.98360108873518  |
| N  | 1.31210017239773  | 2.71756875528123  | 8.93976123507668  |
| N  | 1.52457878511662  | 2.54502617513270  | 6.76386865111497  |
| N  | 2.52417123405878  | 2.15279947044043  | 8.69699515589692  |
| N  | 3.73969906026954  | 1.31584279455463  | 5.35454059867514  |
| N  | 1.22853377919305  | 2.56523748451314  | 5.38454685347823  |
| H  | 1.20412444841477  | 3.55092889443731  | 5.09969405809357  |
| H  | 2.05800864785887  | 2.12375871529246  | 4.94773003604056  |
| C  | 1.92568941698725  | 4.06815577013553  | 13.29882610215025 |
| H  | 2.92481001795658  | 4.34170565320545  | 13.68768305955792 |
| H  | 1.54936510129206  | 3.24195086504612  | 13.91982633016295 |
| C  | 0.96586588348833  | 5.24927794801127  | 13.46327712672054 |
| H  | 1.14791143070586  | 5.63860833520081  | 14.48029856512708 |
| H  | 1.20045780433672  | 6.07994127769444  | 12.77558516738593 |
| C  | -0.51716562347054 | 4.88731105398376  | 13.38369040070115 |
| H  | -0.69717859851906 | 3.92917846666122  | 13.89854009762155 |
| H  | -1.11801436929083 | 5.65869247820202  | 13.89577877447880 |
| C  | 0.60235368677319  | 0.67188058108716  | 11.61745740307497 |
| H  | 0.97334857549099  | 0.47134802200705  | 10.59977868534514 |
| H  | 0.13371678687770  | -0.25528326829361 | 11.99240610709952 |
| C  | 1.75279005162191  | 1.06122487477040  | 12.54323472073702 |
| H  | 1.34843400251093  | 1.32691827962522  | 13.53710893643226 |
| H  | 2.37032565946722  | 0.15969333804574  | 12.70081116111981 |
| C  | 2.70392761527200  | 2.13934364306530  | 12.02044105957513 |
| H  | 3.59643649337237  | 2.19000368616668  | 12.67392358314331 |
| H  | 3.04339594026526  | 1.86381903017807  | 11.01077230334564 |
| C  | 0.62995120660003  | 6.54341048069323  | 9.55492556955994  |
| H  | -0.38198038169732 | 6.37755988350001  | 9.17387405799804  |
| C  | 1.24392264240427  | 7.79426223319870  | 9.46006319487972  |
| H  | 0.71107968986149  | 8.62944765404996  | 8.99766360802301  |
| C  | 2.54035442555306  | 7.94519712685193  | 9.96915778151664  |
| H  | 3.05127989957440  | 8.91134483181531  | 9.91733129044703  |
| C  | 3.17206018119870  | 6.84047547552789  | 10.55471690163122 |
| H  | 4.17978496535967  | 6.91795365076695  | 10.97225607633998 |
| C  | 2.49160049301110  | 5.61941268719681  | 10.61113018421949 |
| C  | 3.10860469173179  | 4.36433366917650  | 11.16842518818316 |
| H  | 3.97574351457150  | 4.60519748650718  | 11.80860198908002 |
| H  | 3.47332113083655  | 3.75929727336047  | 10.32128066201491 |
| C  | -2.37076821742700 | 4.29140769413806  | 9.08471617125153  |

|   |                   |                  |                   |
|---|-------------------|------------------|-------------------|
| H | -2.73647355802456 | 4.49483143991091 | 10.09281657902259 |
| C | -3.18381990650860 | 4.54514919625590 | 7.97808668176076  |
| H | -4.18784318158935 | 4.95089974753087 | 8.12579974988027  |
| C | -2.68290045299603 | 4.27395444888254 | 6.69834246517382  |
| H | -3.28736285010225 | 4.46382153702720 | 5.80709360162782  |
| C | -1.39229745982297 | 3.75268974299796 | 6.57216650086602  |
| H | -0.97708027324357 | 3.52270609419651 | 5.59068999521733  |
| C | -0.63972679776938 | 3.51727295950827 | 7.73454053866643  |
| C | 0.69352254276138  | 2.94616312516378 | 7.77308316257621  |
| C | 2.65833044317576  | 2.05229193226517 | 7.37365806710505  |
| C | 3.82970370684083  | 1.49585822940026 | 6.69339715399223  |
| C | 4.80121316461262  | 0.80680050319817 | 4.71028319464058  |
| H | 4.69007906339492  | 0.68005585160372 | 3.62821504022154  |
| C | 5.98838608929165  | 0.44687615706156 | 5.35711786548406  |
| H | 6.82190883295796  | 0.03198840370558 | 4.78381929206197  |
| C | 6.07709018256416  | 0.63169235101799 | 6.74382053360166  |
| H | 6.98890134604746  | 0.36434456336363 | 7.28609886521720  |
| C | 4.98387237312924  | 1.16698147750431 | 7.42898600674904  |
| H | 5.01405768368568  | 1.33326060669407 | 8.50812243947799  |

**Table S7:** The list of calculated frequencies for DFT optimized molecular structures in Tables S2-S7.

| L      | 1' (LS) | 1' (HS) | [Fe(DAPP)(abpt)] <sup>2+</sup> (LS) | [Fe(DAPP)(abpt)] <sup>2+</sup> (HS) |
|--------|---------|---------|-------------------------------------|-------------------------------------|
| 6.52   | 7.56    | 8.82    | 15.83                               | 12.61                               |
| 10.01  | 10.46   | 10.13   | 22.66                               | 20.44                               |
| 18.60  | 14.85   | 15.16   | 39.17                               | 35.28                               |
| 26.27  | 15.59   | 17.92   | 52.23                               | 44.93                               |
| 33.46  | 25.22   | 23.78   | 57.06                               | 50.03                               |
| 35.51  | 26.45   | 25.76   | 63.86                               | 58.32                               |
| 37.33  | 30.20   | 28.61   | 80.52                               | 68.34                               |
| 40.43  | 33.28   | 34.29   | 101.49                              | 74.93                               |
| 40.79  | 37.91   | 35.94   | 108.81                              | 88.57                               |
| 46.51  | 38.11   | 37.98   | 114.83                              | 100.06                              |
| 47.78  | 41.74   | 41.45   | 126.96                              | 103.62                              |
| 51.78  | 44.62   | 45.27   | 134.17                              | 106.92                              |
| 64.20  | 45.16   | 46.67   | 156.51                              | 127.12                              |
| 81.43  | 48.07   | 47.27   | 178.93                              | 131.32                              |
| 86.60  | 49.01   | 50.29   | 189.16                              | 143.11                              |
| 97.24  | 49.86   | 52.29   | 191.54                              | 155.07                              |
| 98.62  | 50.96   | 55.07   | 211.12                              | 161.58                              |
| 102.97 | 54.11   | 56.15   | 212.68                              | 175.66                              |
| 105.54 | 54.76   | 57.83   | 226.49                              | 185.57                              |
| 124.82 | 58.04   | 59.85   | 237.11                              | 191.85                              |
| 127.67 | 60.95   | 60.71   | 256.79                              | 203.39                              |
| 154.81 | 61.75   | 63.58   | 266.23                              | 212.06                              |
| 156.52 | 67.34   | 64.68   | 281.66                              | 223.73                              |
| 164.22 | 67.82   | 66.21   | 289.88                              | 230.19                              |
| 171.06 | 72.28   | 66.82   | 298.15                              | 266.23                              |
| 183.28 | 73.73   | 68.42   | 300.59                              | 269.59                              |
| 197.61 | 81.22   | 74.12   | 314.40                              | 277.96                              |
| 199.14 | 82.94   | 79.22   | 328.65                              | 291.99                              |
| 211.36 | 87.50   | 83.03   | 333.07                              | 307.45                              |
| 246.07 | 91.06   | 84.60   | 342.98                              | 308.76                              |
| 247.29 | 99.05   | 88.96   | 352.62                              | 323.99                              |
| 283.71 | 102.04  | 90.73   | 354.00                              | 328.50                              |
| 286.62 | 111.33  | 95.78   | 362.72                              | 328.90                              |
| 296.29 | 113.15  | 97.21   | 374.07                              | 351.79                              |
| 304.70 | 117.88  | 100.38  | 396.83                              | 367.16                              |
| 322.69 | 118.93  | 105.38  | 400.88                              | 369.11                              |
| 323.74 | 121.48  | 112.74  | 406.47                              | 388.73                              |
| 334.56 | 127.59  | 119.02  | 430.60                              | 393.56                              |
| 342.36 | 131.29  | 124.50  | 442.91                              | 407.38                              |
| 351.15 | 137.35  | 126.52  | 452.00                              | 414.09                              |
| 386.34 | 143.29  | 129.06  | 460.28                              | 418.20                              |
| 391.86 | 145.09  | 137.67  | 466.17                              | 425.96                              |
| 398.82 | 152.38  | 141.21  | 479.33                              | 443.96                              |
| 401.42 | 155.55  | 151.28  | 486.93                              | 445.16                              |
| 404.50 | 163.48  | 154.53  | 497.15                              | 461.12                              |
| 405.01 | 168.53  | 159.29  | 504.80                              | 492.41                              |
| 405.86 | 169.42  | 166.17  | 518.87                              | 492.56                              |

|        |        |        |         |         |
|--------|--------|--------|---------|---------|
| 409.77 | 172.77 | 169.16 | 530.62  | 519.99  |
| 427.49 | 191.22 | 170.36 | 555.19  | 528.74  |
| 428.10 | 197.94 | 173.12 | 610.95  | 561.27  |
| 460.60 | 210.43 | 179.37 | 618.23  | 578.32  |
| 481.35 | 211.94 | 189.22 | 634.47  | 601.02  |
| 500.48 | 215.92 | 192.27 | 636.97  | 616.36  |
| 503.61 | 217.49 | 197.38 | 648.54  | 625.42  |
| 508.08 | 217.95 | 203.42 | 670.88  | 631.59  |
| 518.84 | 229.89 | 205.33 | 675.54  | 636.46  |
| 519.24 | 231.80 | 207.72 | 683.73  | 672.96  |
| 542.06 | 236.84 | 210.11 | 688.09  | 693.94  |
| 543.05 | 246.82 | 217.30 | 702.21  | 700.14  |
| 582.21 | 268.60 | 219.78 | 727.73  | 724.35  |
| 583.02 | 276.82 | 221.72 | 732.63  | 730.31  |
| 586.43 | 278.97 | 227.17 | 747.78  | 744.07  |
| 592.55 | 282.52 | 244.03 | 749.73  | 747.07  |
| 600.01 | 287.28 | 257.32 | 757.85  | 748.93  |
| 603.16 | 296.77 | 262.59 | 766.34  | 758.34  |
| 616.16 | 302.71 | 264.76 | 780.70  | 768.92  |
| 616.25 | 306.18 | 269.54 | 784.36  | 793.08  |
| 630.88 | 308.79 | 290.92 | 799.23  | 802.15  |
| 631.21 | 310.39 | 293.68 | 816.10  | 802.95  |
| 651.09 | 318.94 | 301.74 | 847.69  | 843.70  |
| 657.39 | 323.74 | 302.72 | 865.10  | 850.64  |
| 692.40 | 327.28 | 303.67 | 890.40  | 874.39  |
| 693.70 | 351.84 | 312.72 | 892.91  | 886.51  |
| 698.17 | 353.35 | 321.55 | 898.42  | 899.44  |
| 699.25 | 356.44 | 322.83 | 901.02  | 902.40  |
| 704.82 | 365.51 | 347.41 | 911.91  | 908.52  |
| 704.99 | 369.56 | 348.43 | 917.70  | 913.19  |
| 735.26 | 372.33 | 358.48 | 928.58  | 921.42  |
| 735.64 | 375.65 | 359.56 | 964.88  | 954.92  |
| 742.44 | 379.21 | 372.03 | 968.18  | 971.71  |
| 743.25 | 386.01 | 372.86 | 976.74  | 972.32  |
| 748.97 | 392.60 | 378.89 | 979.04  | 973.96  |
| 749.04 | 402.53 | 388.21 | 982.24  | 981.43  |
| 751.21 | 403.63 | 399.71 | 987.41  | 988.05  |
| 751.84 | 409.85 | 399.93 | 989.12  | 988.86  |
| 757.34 | 414.40 | 402.51 | 993.51  | 989.63  |
| 759.66 | 415.12 | 404.26 | 994.84  | 992.34  |
| 798.75 | 424.59 | 406.95 | 1014.98 | 1007.19 |
| 798.92 | 429.22 | 408.22 | 1015.44 | 1018.18 |
| 800.01 | 437.82 | 417.34 | 1020.83 | 1022.17 |
| 800.49 | 447.03 | 419.67 | 1024.62 | 1023.90 |
| 816.19 | 449.69 | 424.83 | 1026.51 | 1023.98 |
| 817.94 | 452.92 | 435.58 | 1032.87 | 1027.35 |
| 827.89 | 461.42 | 443.89 | 1041.39 | 1028.09 |
| 838.69 | 463.64 | 445.47 | 1048.61 | 1044.38 |
| 846.57 | 464.90 | 447.44 | 1062.58 | 1048.34 |
| 852.02 | 466.74 | 468.13 | 1068.67 | 1059.22 |

|         |        |        |         |         |
|---------|--------|--------|---------|---------|
| 865.87  | 467.76 | 469.44 | 1075.15 | 1062.64 |
| 867.15  | 470.36 | 469.96 | 1078.16 | 1063.90 |
| 888.94  | 474.79 | 479.11 | 1080.41 | 1074.88 |
| 890.56  | 478.45 | 480.96 | 1094.74 | 1080.44 |
| 910.92  | 485.05 | 484.74 | 1097.01 | 1085.36 |
| 911.28  | 495.62 | 495.35 | 1098.51 | 1098.16 |
| 911.42  | 503.89 | 504.02 | 1107.29 | 1104.41 |
| 911.86  | 507.47 | 506.17 | 1114.01 | 1110.00 |
| 915.33  | 508.82 | 510.13 | 1134.70 | 1110.80 |
| 915.85  | 511.18 | 511.58 | 1140.62 | 1122.98 |
| 940.70  | 521.67 | 518.68 | 1143.37 | 1140.75 |
| 941.57  | 526.81 | 519.53 | 1143.73 | 1143.71 |
| 973.92  | 528.18 | 526.61 | 1151.06 | 1144.99 |
| 974.09  | 537.00 | 537.46 | 1156.80 | 1152.78 |
| 984.14  | 543.01 | 544.01 | 1165.03 | 1160.75 |
| 984.55  | 543.26 | 546.49 | 1175.45 | 1165.90 |
| 985.56  | 553.24 | 554.54 | 1202.58 | 1194.79 |
| 985.60  | 557.72 | 558.02 | 1225.89 | 1226.19 |
| 985.93  | 563.40 | 575.56 | 1253.41 | 1250.70 |
| 986.05  | 563.53 | 576.29 | 1264.10 | 1264.86 |
| 994.05  | 591.77 | 591.46 | 1268.31 | 1266.06 |
| 994.81  | 592.39 | 591.76 | 1278.16 | 1273.28 |
| 1018.76 | 595.61 | 596.38 | 1278.77 | 1274.11 |
| 1021.47 | 596.11 | 597.25 | 1280.89 | 1285.42 |
| 1021.69 | 597.69 | 598.61 | 1293.86 | 1291.89 |
| 1022.04 | 600.23 | 601.02 | 1297.25 | 1295.27 |
| 1025.17 | 605.70 | 603.67 | 1304.47 | 1303.60 |
| 1025.89 | 608.67 | 604.17 | 1309.09 | 1309.28 |
| 1037.66 | 609.29 | 605.32 | 1312.82 | 1311.48 |
| 1039.59 | 609.75 | 606.57 | 1317.69 | 1312.65 |
| 1039.93 | 613.02 | 608.77 | 1330.28 | 1322.61 |
| 1042.19 | 614.40 | 610.07 | 1337.54 | 1328.25 |
| 1052.16 | 621.01 | 622.85 | 1345.24 | 1336.31 |
| 1052.32 | 624.83 | 624.99 | 1355.10 | 1356.73 |
| 1058.94 | 632.06 | 629.02 | 1357.53 | 1358.21 |
| 1060.02 | 636.82 | 629.40 | 1368.14 | 1369.00 |
| 1067.38 | 641.33 | 630.46 | 1392.92 | 1387.25 |
| 1073.33 | 642.79 | 631.07 | 1403.93 | 1400.25 |
| 1095.26 | 652.06 | 652.63 | 1408.17 | 1407.54 |
| 1095.73 | 653.14 | 653.59 | 1417.58 | 1409.99 |
| 1098.12 | 678.64 | 662.48 | 1420.20 | 1414.13 |
| 1098.20 | 682.22 | 664.04 | 1423.02 | 1422.47 |
| 1104.84 | 687.14 | 674.84 | 1433.74 | 1431.44 |
| 1106.91 | 687.78 | 678.32 | 1434.77 | 1432.31 |
| 1127.59 | 688.86 | 693.89 | 1436.14 | 1436.01 |
| 1128.62 | 695.24 | 694.16 | 1440.43 | 1436.30 |
| 1143.15 | 696.79 | 698.32 | 1451.63 | 1450.70 |
| 1143.49 | 699.39 | 700.42 | 1460.20 | 1457.10 |
| 1144.88 | 702.42 | 702.00 | 1462.19 | 1457.96 |
| 1145.03 | 707.26 | 702.29 | 1464.05 | 1462.40 |



|         |        |        |         |         |
|---------|--------|--------|---------|---------|
| 1183.60 | 737.39 | 737.88 | 1467.75 | 1465.97 |
| 1183.99 | 738.65 | 738.74 | 1468.98 | 1467.70 |
| 1223.68 | 742.39 | 739.45 | 1472.27 | 1472.06 |
| 1228.93 | 745.01 | 740.64 | 1488.16 | 1482.37 |
| 1261.77 | 749.04 | 748.18 | 1489.42 | 1487.47 |
| 1262.47 | 750.09 | 750.60 | 1527.81 | 1519.51 |
| 1272.49 | 757.12 | 754.83 | 1539.39 | 1533.02 |
| 1272.95 | 757.95 | 755.75 | 1552.33 | 1549.14 |
| 1277.23 | 758.48 | 756.63 | 1576.96 | 1574.90 |
| 1283.17 | 763.53 | 757.26 | 1580.62 | 1586.36 |
| 1285.36 | 766.25 | 766.21 | 1587.01 | 1587.94 |
| 1287.54 | 768.90 | 766.43 | 1609.08 | 1588.67 |
| 1308.26 | 785.73 | 793.96 | 1612.02 | 1611.03 |
| 1308.42 | 786.27 | 795.17 | 1621.95 | 1616.37 |
| 1313.51 | 796.97 | 799.34 | 1628.51 | 1623.83 |
| 1313.80 | 798.29 | 799.70 | 1638.31 | 1628.89 |
| 1325.65 | 805.59 | 810.42 | 3002.32 | 2982.14 |
| 1326.00 | 815.67 | 819.15 | 3012.82 | 2992.06 |
| 1356.42 | 820.71 | 822.62 | 3016.52 | 3009.00 |
| 1363.21 | 821.86 | 822.81 | 3022.34 | 3012.55 |
| 1396.87 | 824.60 | 825.62 | 3026.30 | 3018.08 |
| 1404.46 | 825.41 | 825.89 | 3026.94 | 3019.47 |
| 1404.68 | 827.10 | 830.83 | 3032.33 | 3029.84 |
| 1404.77 | 831.52 | 834.10 | 3064.99 | 3061.55 |
| 1417.31 | 840.38 | 840.81 | 3071.25 | 3065.97 |
| 1420.31 | 843.07 | 843.09 | 3078.35 | 3068.13 |
| 1429.62 | 845.86 | 846.67 | 3087.01 | 3078.17 |
| 1429.91 | 848.69 | 851.18 | 3090.21 | 3082.04 |
| 1439.95 | 862.55 | 864.64 | 3095.71 | 3087.63 |
| 1440.20 | 866.87 | 868.07 | 3113.03 | 3095.60 |
| 1452.65 | 871.75 | 874.44 | 3155.08 | 3148.88 |
| 1453.13 | 875.92 | 876.20 | 3163.27 | 3162.09 |
| 1463.24 | 892.50 | 889.79 | 3173.21 | 3166.54 |
| 1463.52 | 892.84 | 891.85 | 3174.58 | 3172.07 |
| 1463.93 | 901.62 | 902.69 | 3183.34 | 3176.22 |
| 1464.96 | 906.45 | 904.35 | 3184.15 | 3182.02 |
| 1501.43 | 909.88 | 910.79 | 3189.12 | 3182.84 |
| 1501.79 | 910.35 | 911.60 | 3189.40 | 3190.12 |
| 1518.52 | 910.64 | 912.80 | 3194.49 | 3191.14 |
| 1518.71 | 912.23 | 913.70 | 3196.04 | 3192.30 |
| 1581.84 | 912.71 | 915.06 | 3198.57 | 3195.85 |
| 1582.29 | 914.54 | 916.16 | 3211.92 | 3201.91 |
| 1588.38 | 919.60 | 920.26 | 3223.36 | 3215.92 |
| 1588.50 | 922.00 | 921.03 | 3353.94 | 3367.66 |
| 1589.79 | 955.49 | 948.55 | 3356.99 | 3368.20 |
| 1590.00 | 961.69 | 949.55 | 3374.81 | 3381.08 |
| 1608.64 | 985.88 | 979.94 | 3418.67 | 3436.17 |
| 1608.80 | 987.39 | 982.03 | 3422.72 | 3437.31 |
| 1614.49 | 988.03 | 987.05 |         |         |
| 1614.66 | 988.52 | 989.27 |         |         |

|         |         |         |  |  |
|---------|---------|---------|--|--|
| 1672.11 | 993.10  | 992.80  |  |  |
| 1675.70 | 993.83  | 993.19  |  |  |
| 3094.14 | 996.22  | 993.44  |  |  |
| 3099.95 | 998.01  | 1000.04 |  |  |
| 3135.87 | 1007.75 | 1001.82 |  |  |
| 3136.33 | 1011.54 | 1002.15 |  |  |
| 3152.29 | 1020.48 | 1017.15 |  |  |
| 3152.41 | 1023.03 | 1021.96 |  |  |
| 3165.00 | 1023.13 | 1022.71 |  |  |
| 3165.08 | 1024.70 | 1024.36 |  |  |
| 3169.64 | 1024.86 | 1025.03 |  |  |
| 3169.81 | 1025.15 | 1027.67 |  |  |
| 3179.42 | 1026.96 | 1028.59 |  |  |
| 3179.53 | 1027.26 | 1030.54 |  |  |
| 3179.72 | 1029.13 | 1035.51 |  |  |
| 3180.80 | 1035.30 | 1037.16 |  |  |
| 3184.83 | 1042.79 | 1043.12 |  |  |
| 3185.11 | 1043.39 | 1043.51 |  |  |
| 3188.06 | 1043.81 | 1044.11 |  |  |
| 3188.46 | 1045.33 | 1044.78 |  |  |
| 3190.86 | 1046.61 | 1049.68 |  |  |
| 3190.99 | 1049.69 | 1050.28 |  |  |
| 3205.84 | 1049.94 | 1052.78 |  |  |
| 3207.32 | 1053.35 | 1054.98 |  |  |
| 3208.57 | 1058.22 | 1056.27 |  |  |
| 3211.97 | 1061.46 | 1059.49 |  |  |
| 3222.44 | 1071.24 | 1067.91 |  |  |
| 3222.76 | 1072.84 | 1069.02 |  |  |
|         | 1073.69 | 1071.06 |  |  |
|         | 1078.39 | 1089.63 |  |  |
|         | 1098.37 | 1096.89 |  |  |
|         | 1099.48 | 1098.18 |  |  |
|         | 1099.81 | 1103.37 |  |  |
|         | 1105.95 | 1104.58 |  |  |
|         | 1112.92 | 1111.18 |  |  |
|         | 1114.28 | 1114.71 |  |  |
|         | 1144.32 | 1139.54 |  |  |
|         | 1146.53 | 1140.13 |  |  |
|         | 1146.63 | 1145.81 |  |  |
|         | 1147.26 | 1146.66 |  |  |
|         | 1149.25 | 1149.66 |  |  |
|         | 1149.40 | 1150.02 |  |  |
|         | 1181.61 | 1181.84 |  |  |
|         | 1182.39 | 1182.19 |  |  |
|         | 1187.59 | 1183.96 |  |  |
|         | 1189.19 | 1185.40 |  |  |
|         | 1214.91 | 1218.63 |  |  |
|         | 1220.92 | 1222.36 |  |  |
|         | 1221.61 | 1224.52 |  |  |
|         | 1226.79 | 1234.62 |  |  |

|  |         |         |  |  |
|--|---------|---------|--|--|
|  | 1240.34 | 1241.06 |  |  |
|  | 1240.61 | 1243.28 |  |  |
|  | 1266.40 | 1267.23 |  |  |
|  | 1267.61 | 1267.86 |  |  |
|  | 1268.52 | 1268.94 |  |  |
|  | 1271.83 | 1269.60 |  |  |
|  | 1278.61 | 1275.68 |  |  |
|  | 1280.34 | 1277.02 |  |  |
|  | 1285.90 | 1287.57 |  |  |
|  | 1290.72 | 1288.90 |  |  |
|  | 1297.82 | 1295.50 |  |  |
|  | 1300.58 | 1295.85 |  |  |
|  | 1309.51 | 1310.94 |  |  |
|  | 1310.10 | 1311.36 |  |  |
|  | 1313.88 | 1312.12 |  |  |
|  | 1314.44 | 1313.60 |  |  |
|  | 1344.13 | 1334.68 |  |  |
|  | 1345.02 | 1335.75 |  |  |
|  | 1347.63 | 1347.85 |  |  |
|  | 1349.07 | 1349.03 |  |  |
|  | 1354.13 | 1356.11 |  |  |
|  | 1357.98 | 1358.59 |  |  |
|  | 1369.20 | 1369.91 |  |  |
|  | 1372.56 | 1376.08 |  |  |
|  | 1397.54 | 1397.94 |  |  |
|  | 1401.62 | 1401.77 |  |  |
|  | 1407.22 | 1407.36 |  |  |
|  | 1408.13 | 1410.10 |  |  |
|  | 1412.18 | 1410.94 |  |  |
|  | 1413.59 | 1411.43 |  |  |
|  | 1414.84 | 1415.45 |  |  |
|  | 1415.07 | 1415.65 |  |  |
|  | 1418.00 | 1417.21 |  |  |
|  | 1418.35 | 1418.43 |  |  |
|  | 1437.89 | 1435.62 |  |  |
|  | 1438.72 | 1435.98 |  |  |
|  | 1445.22 | 1444.29 |  |  |
|  | 1447.75 | 1448.74 |  |  |
|  | 1455.69 | 1454.65 |  |  |
|  | 1456.43 | 1455.79 |  |  |
|  | 1457.80 | 1460.60 |  |  |
|  | 1461.96 | 1461.61 |  |  |
|  | 1475.02 | 1474.25 |  |  |
|  | 1476.12 | 1475.23 |  |  |
|  | 1476.99 | 1475.58 |  |  |
|  | 1477.25 | 1479.27 |  |  |
|  | 1493.33 | 1490.98 |  |  |
|  | 1500.31 | 1499.50 |  |  |
|  | 1531.52 | 1526.71 |  |  |
|  | 1532.95 | 1528.22 |  |  |

|  |         |         |  |  |
|--|---------|---------|--|--|
|  | 1558.35 | 1558.22 |  |  |
|  | 1561.43 | 1562.04 |  |  |
|  | 1576.71 | 1574.37 |  |  |
|  | 1579.01 | 1580.48 |  |  |
|  | 1585.92 | 1587.11 |  |  |
|  | 1587.79 | 1588.80 |  |  |
|  | 1590.29 | 1589.29 |  |  |
|  | 1592.25 | 1591.04 |  |  |
|  | 1596.54 | 1596.86 |  |  |
|  | 1596.85 | 1600.48 |  |  |
|  | 1612.62 | 1613.57 |  |  |
|  | 1613.90 | 1615.05 |  |  |
|  | 1632.07 | 1624.55 |  |  |
|  | 1632.89 | 1624.88 |  |  |
|  | 1638.87 | 1633.52 |  |  |
|  | 1639.47 | 1634.74 |  |  |
|  | 2137.38 | 2128.81 |  |  |
|  | 2137.69 | 2134.59 |  |  |
|  | 2160.47 | 2153.85 |  |  |
|  | 2162.54 | 2154.27 |  |  |
|  | 2227.63 | 2203.56 |  |  |
|  | 2233.60 | 2205.33 |  |  |
|  | 3108.07 | 3127.09 |  |  |
|  | 3141.36 | 3145.72 |  |  |
|  | 3165.28 | 3165.68 |  |  |
|  | 3166.84 | 3166.50 |  |  |
|  | 3178.11 | 3167.12 |  |  |
|  | 3179.13 | 3172.51 |  |  |
|  | 3180.45 | 3178.80 |  |  |
|  | 3181.72 | 3179.40 |  |  |
|  | 3186.56 | 3183.91 |  |  |
|  | 3187.96 | 3184.24 |  |  |
|  | 3190.12 | 3192.09 |  |  |
|  | 3191.33 | 3192.73 |  |  |
|  | 3196.03 | 3197.52 |  |  |
|  | 3196.80 | 3197.61 |  |  |
|  | 3197.50 | 3197.66 |  |  |
|  | 3197.74 | 3199.09 |  |  |
|  | 3199.93 | 3203.89 |  |  |
|  | 3201.04 | 3204.15 |  |  |
|  | 3204.24 | 3205.01 |  |  |
|  | 3204.91 | 3205.86 |  |  |
|  | 3205.21 | 3206.44 |  |  |
|  | 3205.61 | 3208.66 |  |  |
|  | 3208.77 | 3210.78 |  |  |
|  | 3211.56 | 3211.83 |  |  |
|  | 3213.50 | 3214.47 |  |  |
|  | 3214.40 | 3219.81 |  |  |
|  | 3218.60 | 3219.93 |  |  |
|  | 3221.19 | 3221.84 |  |  |

|  |         |         |  |  |
|--|---------|---------|--|--|
|  | 3223.08 | 3222.82 |  |  |
|  | 3225.72 | 3227.04 |  |  |
|  | 3226.49 | 3227.91 |  |  |
|  | 3226.73 | 3228.03 |  |  |
|  | 3226.88 | 3231.75 |  |  |
|  | 3238.45 | 3274.17 |  |  |
|  | 3476.80 | 3479.58 |  |  |
|  | 3480.43 | 3482.47 |  |  |
|  | 3601.00 | 3606.03 |  |  |
|  | 3606.56 | 3608.93 |  |  |

**Table S8:** The list of TPSSh calculated values of the electron density at the iron nucleus ( $\rho_0^{\text{TPSSh}}$ ) and the quadrupole splitting ( $\Delta E_Q^{\text{TPSSh}}$ ) for DFT optimized molecular structures in Tables S3-S7<sup>a</sup>

|                                | {Fe(abpt)} <sup>LS</sup> |                             | {Fe(abpt)} <sup>HS</sup> |                             | {Fe(Cp)}                |                             |
|--------------------------------|--------------------------|-----------------------------|--------------------------|-----------------------------|-------------------------|-----------------------------|
|                                | $\rho_0^{\text{TPSSh}}$  | $\Delta E_Q^{\text{TPSSh}}$ | $\rho_0^{\text{TPSSh}}$  | $\Delta E_Q^{\text{TPSSh}}$ | $\rho_0^{\text{TPSSh}}$ | $\Delta E_Q^{\text{TPSSh}}$ |
| 1'(LS)                         | 11820.072272201          | -0.490                      |                          |                             | 11819.948596626         | 2.291                       |
|                                |                          |                             |                          |                             | 11819.948505317         | 2.302                       |
|                                |                          |                             |                          |                             | 11819.951281692         | 2.290                       |
| 1'(HS)                         |                          |                             | 11818.924826778          | 3.300                       | 11819.948057032         | 2.301                       |
| [Fe(DAPP)(abpt)] <sup>2+</sup> |                          |                             |                          |                             |                         |                             |
| (LS)                           | 11819.926867403          | 0.367                       |                          |                             |                         |                             |
| [Fe(DAPP)(abpt)] <sup>2+</sup> |                          |                             |                          |                             |                         |                             |
| (HS)                           |                          |                             | 11819.071137816          | -3.173                      |                         |                             |

<sup>a</sup> values of  $\rho_0^{\text{TPSSh}}$  are in au<sup>-3</sup> and values of the quadrupole splitting ( $\Delta E_Q^{\text{TPSSh}}$ ) are in mms<sup>-1</sup>.
